# Supplementary material
Source: HighWire-hosted journal article supplement (https://erj.ersjournals.com/content/54/2/1900963)
Supplement: inline-supplementary-material-1 [file inline-supplementary-material-1.pdf]

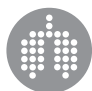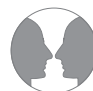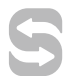

SHAREABLE PDF

# Inhaled corticosteroids in asthma and the need for universal health coverage

Mina Gaga <sup>1</sup>, Nikolai Khaltaev<sup>2</sup> and Cherian Varghese<sup>3</sup>

**Affiliations:** <sup>1</sup>7th Respiratory Medicine Dept and Asthma Centre, Athens Chest Hospital, Athens, Greece. <sup>2</sup>Global Alliance against Chronic Respiratory Diseases GARD, Geneva, Switzerland. <sup>3</sup>Management of NCDs Unit, World Health Organization, Geneva, Switzerland.

**Correspondence:** Mina Gaga, Athens Chest Hospital Sotiria, 7th Respiratory Medicine Dept, 152 Mesogion Ave, Athens 15452, Greece. E-mail: minagaga@yahoo.com

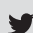

@ERSpublications

**Evidence and ICS-based asthma care reduces morbidity and mortality, and improves quality of life. It should be instituted worldwide.** <http://bit.ly/2J4sW7E>

**Cite this article as:** Gaga M, Khaltaev N, Varghese C. Inhaled corticosteroids in asthma and the need for universal health coverage. *Eur Respir J* 2019; 54: 1900963 [<https://doi.org/10.1183/13993003.00963-2019>].

This single-page version can be shared freely online.

We read with great interest the article on inhaled corticosteroids (ICS) and their effect on asthma progression and mortality recently published in the *European Respiratory Journal* [1]. The article presents an excellent review on asthma natural history, lung function evolution and the role of exacerbations in the course of the disease, and on mortality as well as the effect of ICS on the disease. We absolutely agree with the writers that the introduction of ICS has indeed made a huge impact on asthma morbidity and mortality. Before their introduction, severe asthma exacerbations and deaths were frequently seen in Europe, North America, Australia and New Zealand [2–4]. These were reduced drastically after the introduction of ICS and health programmes to ensure access to medications and training of healthcare personnel working in the community to diagnose and manage asthma: In Finland, the 10 year asthma plan showed that with the initiation of the programme in 1993, asthma morbidity fell and hospital days were reduced by 54% from 1993 to 2003 [5]. At the same time, more asthma patients were diagnosed and treated but the overall cost and per patient cost was also reduced.
